# Supplementary material
Source: Elsevier journal article supplement (https://rcastoragev2.blob.core.windows.net/54196509e6959d4a186fc690c701ee9e/mmc1.pdf)
Supplement: mmc1 [file mmc1.pdf]

# THE LANCET

## **Supplementary appendix**

This appendix formed part of the original submission and has been peer reviewed.  
We post it as supplied by the authors.

Supplement to: Chappell LC, Brocklehurst P, Green ME, et al. Planned early delivery or expectant management for late preterm pre-eclampsia (PHOENIX): a randomised controlled trial. *Lancet* 2019; published online Aug 28. [http://dx.doi.org/10.1016/S0140-6736\(19\)31963-4](http://dx.doi.org/10.1016/S0140-6736(19)31963-4).

## Contents

|                                                                                                                                                                                                                                                                    |    |
|--------------------------------------------------------------------------------------------------------------------------------------------------------------------------------------------------------------------------------------------------------------------|----|
| Supplementary Table 1: Recruitment by centre .....                                                                                                                                                                                                                 | 2  |
| Supplementary Table 2: Additional maternal demographic and pregnancy characteristics at trial entry ..                                                                                                                                                             | 4  |
| Supplementary Table 3: Additional secondary maternal outcomes .....                                                                                                                                                                                                | 8  |
| Supplementary Table 4: Process outcomes: time between randomisation to initiation of delivery and delivery.....                                                                                                                                                    | 11 |
| Supplementary Table 5: Additional secondary perinatal outcomes (Intention To Treat analysis) .....                                                                                                                                                                 | 12 |
| Supplementary Table 6: Secondary perinatal outcomes post randomisation (by Per Protocol analysis) ..                                                                                                                                                               | 15 |
| Supplementary Table 7: Additional secondary perinatal outcomes (by Per Protocol analysis).....                                                                                                                                                                     | 17 |
| Supplementary Table 8: Unexpected maternal and infant serious adverse events by allocation .....                                                                                                                                                                   | 20 |
| Supplementary Figure 1: Forest plot for sub-group analysis (Per Protocol population) of primary perinatal outcome comparing Planned Delivery (PD) with Expectant Management (EM). p-values compare risk ratios across the different sub-groups of each factor..... | 21 |
| Supplementary Table 9: Sensitivity analysis for the primary outcome, excluding women (maternal outcome) and babies (perinatal outcome) in the planned delivery arm for whom initiation of delivery was greater than 96 hours after randomisation .....             | 22 |
| Members of the PHOENIX Study Group.....                                                                                                                                                                                                                            | 23 |

**Supplementary Table 1: Recruitment by centre**

| <b>Centre</b>                             | <b>Planned delivery<br/>(n=448)</b> | <b>Expectant management<br/>(n=451)</b> |
|-------------------------------------------|-------------------------------------|-----------------------------------------|
| St Thomas' Hospital, London               | 40 (9%)                             | 40 (9%)                                 |
| Darent Valley Hospital                    | 22 (5%)                             | 20 (4%)                                 |
| St Mary's Hospital, Manchester            | 28 (6%)                             | 22 (5%)                                 |
| Bradford Royal Infirmary                  | 16 (4%)                             | 12 (3%)                                 |
| West Middlesex University NHS Trust       | 26 (5%)                             | 31 (7%)                                 |
| Nottingham City Hospital                  | 11 (3%)                             | 15 (3%)                                 |
| Leeds Teaching Hospitals - St James'      | 18 (4%)                             | 15 (3%)                                 |
| Liverpool Women's                         | 22 (5%)                             | 24 (5%)                                 |
| Queens Medical Centre                     | 10 (2%)                             | 13 (3%)                                 |
| Royal Victoria Infirmary                  | 18 (4%)                             | 21 (5%)                                 |
| James Cook University Hospital            | 18 (4%)                             | 19 (4%)                                 |
| Sunderland Royal Hospital                 | 17 (4%)                             | 21 (5%)                                 |
| University College Hospital               | 10 (2%)                             | 14 (3%)                                 |
| Birmingham Women's Hospital               | 11 (3%)                             | 9 (2%)                                  |
| St George's Hospital                      | 8 (2%)                              | 7 (2%))                                 |
| Royal Stoke University Hospital           | 7 (2%)                              | 7 (2%)                                  |
| Western Sussex Hospitals                  | 7 (2%)                              | 11 (2%)                                 |
| Whittington Hospital                      | 4 (1%)                              | 3 (1%)                                  |
| ABM University Hospitals, Wales           | 23 (5%)                             | 22 (5%)                                 |
| Birmingham City Hospital                  | 8 (2%)                              | 7 (2%)                                  |
| Birmingham Heartlands Hospital            | 6 (1%)                              | 1 (0%)                                  |
| Warrington and Halton Hospitals           | 2 (0%)                              | 3 (1%)                                  |
| Chesterfield Royal Hospital               | 5 (1%)                              | 8 (2%)                                  |
| Royal United Hospital, Bath               | 4 (1%)                              | 5 (1%)                                  |
| Kingston Hospital NHS Trust               | 16 (4%)                             | 11 (2%)                                 |
| Leighton Hospital                         | 6 (1%)                              | 7 (2%)                                  |
| Leicester Royal infirmary                 | 8 (2%)                              | 8 (2%)                                  |
| Shrewsbury and Telford Hospital NHS Trust | 2 (0%)                              | 3 (1%)                                  |
| Royal Preston Hospital                    | 2 (0%)                              | 3 (1%)                                  |
| Northampton General                       | 6 (1%)                              | 7 (1%)                                  |
| Gloucestershire Royal Hospital            | 0 (0%)                              | 2 (0%)                                  |

|                                     |         |         |
|-------------------------------------|---------|---------|
| St Michael's Hospital, Bristol      | 2 (0%)  | 5 (1%)  |
| Royal London Hospital               | 5 (1%)  | 5 (1%)  |
| Whipps Cross Hospital               | 9 (2%)  | 7 (2%)  |
| New Cross Hospital, wolverhampton   | 4 (1%)  | 4 (1%)  |
| Cambridge University Hospitals      | 3 (1%)  | 0 (0%)  |
| Chelsea and Westminster Hospital    | 2 (0%)  | 5 (1%)  |
| Royal Bolton Hospital               | 4 (1%)  | 2 (0%)  |
| St Helier Hospital                  | 2 (0%)  | 2 (0%)  |
| University Hospital, Lewisham       | 0 (0%)  | 2 (0%)  |
| Luton and Dunstable                 | 1 (0%)  | 0 (0%)  |
| Epsom Hospital                      | 2 (0%)  | 0 (0%)  |
| Queen Elizabeth Hospital, Greenwich | 5 (1%)  | 1 (0%)  |
| Queen's Hospital, Romford           | 2 (0%)  | 2 (0%)  |
| Croydon University Hospital         | 23 (5%) | 25 (6%) |
| Broomfield Hospital, Chelmsford     | 3 (1%)  | 0 (0%)  |

**Supplementary Table 2: Additional maternal demographic and pregnancy characteristics at trial entry**

|                                                            | <b>Planned delivery<br/>(n = 448)</b> | <b>Expectant<br/>management<br/>(n = 451)</b> |
|------------------------------------------------------------|---------------------------------------|-----------------------------------------------|
| <b>Median (IQR) gestational age at booking (weeks)</b>     | 10 (8 to 12)                          | 10 (8 to 12)                                  |
| <b>Deprivation Index quintile (England only)</b>           |                                       |                                               |
| 1 (Least deprived)                                         | 41/425 (10%)                          | 25/428 (6%)                                   |
| 2                                                          | 53/425 (13%)                          | 53/428 (12%)                                  |
| 3                                                          | 64/425 (15%)                          | 72/428 (17%)                                  |
| 4                                                          | 106/425 (25%)                         | 118/428 (28%)                                 |
| 5 (Most deprived)                                          | 161/425 (38%)                         | 160/428 (37%)                                 |
| Centre in Wales (quintiles not available)                  | 23                                    | 22                                            |
| <b>Parity (previous pregnancies ≥24 weeks' gestation)*</b> |                                       |                                               |
| 0                                                          | 254 (57%)                             | 260 (58%)                                     |
| 1                                                          | 104 (23%)                             | 103 (23%)                                     |
| 2                                                          | 49 (11%)                              | 52 (12%)                                      |
| >2                                                         | 41 (9%)                               | 36 (8%)                                       |
| <b>Mode of previous deliveries</b>                         |                                       |                                               |
| Total number of previous deliveries                        | 368                                   | 335                                           |
| Spontaneous vaginal delivery                               | 241/368 (66%)                         | 201/335 (60%)                                 |
| Assisted vaginal delivery                                  | 20/368 (5%)                           | 24/335 (7%)                                   |
| Caesarean section                                          | 102/368 (28%)                         | 110/335 (33%)                                 |
| Unknown                                                    | 5/368 (1%)                            | 0/335 (0%)                                    |
| <b>Previous pregnancies &lt;24 weeks' gestation</b>        |                                       |                                               |
| 0                                                          | 295 (66%)                             | 309 (69%)                                     |
| 1                                                          | 96 (21%)                              | 87 (19%)                                      |
| 2                                                          | 28 (6%)                               | 33 (7%)                                       |
| >2                                                         | 29 (7%)                               | 22 (5%)                                       |
| <b>Body mass index (kg/m<sup>2</sup>)</b>                  |                                       |                                               |
| <18.5                                                      | 4 (1%)                                | 4 (1%)                                        |
| 18.5-24.9                                                  | 126 (28%)                             | 114 (25%)                                     |
| 25.0-29.9                                                  | 120 (27%)                             | 146 (32%)                                     |
| 30.0-39.9                                                  | 161 (36%)                             | 153 (34%)                                     |
| ≥40.0                                                      | 37 (8%)                               | 34 (8%)                                       |

|                                                                                           |                     |                     |
|-------------------------------------------------------------------------------------------|---------------------|---------------------|
| <b>First trimester Pregnancy-associated plasma protein-A</b>                              |                     |                     |
| <b>Multiple of the Median</b>                                                             |                     |                     |
| Number recorded                                                                           | 159 (36%)           | 172 (39%)           |
| Median (IQR)                                                                              | 0.80 (0.51 to 1.27) | 0.85 (0.51 to 1.35) |
| <b>Second trimester uterine artery Doppler mean pulsatility index</b>                     |                     |                     |
| Number recorded                                                                           | 89 (20%)            | 91 (20%)            |
| Median (IQR)                                                                              | 1.20 (0.94 to 1.49) | 1.09 (0.88 to 1.49) |
| <b>Parameters related to diagnosis of pre-eclampsia</b>                                   |                     |                     |
| <b>Highest blood pressure reading that led to diagnosis (mmHg)</b>                        |                     |                     |
| If based on single diastolic blood pressure $\geq 110$ mmHg: n (%)                        | 53 (12%)            | 64 (14%)            |
| Mean (SD) systolic blood pressure                                                         | 163.8 (16.76)       | 166.1 (15.07)       |
| Mean (SD) diastolic blood pressure                                                        | 114.2 (6.30)        | 114.1 (5.24)        |
| If based on 2 diastolic blood pressure readings $\geq 90$ mmHg, mean of 2 readings: n (%) | 395 (88%)           | 387 (86%)           |
| Mean (SD) systolic blood pressure                                                         | 149.7 (9.99)        | 150.0 (10.19)       |
| Mean (SD) diastolic blood pressure                                                        | 96.7 (4.37)         | 96.5 (4.06)         |
| All participants: n (%)                                                                   | 448 (100%)          | 451 (100%)          |
| Mean (SD) systolic blood pressure                                                         | 151.4 (11.88)       | 152.3 (12.36)       |
| Mean (SD) diastolic blood pressure                                                        | 98.8 (7.30)         | 99.0 (7.47)         |
| <b>Additional parameters leading to diagnosis of pre-eclampsia (non-exclusive)</b>        |                     |                     |
| Urinary protein-creatinine ratio $\geq 30$ (mg/mmol): n (%)                               | 405 (90%)           | 407 (90%)           |
| Median (IQR) (if $\geq 30$ mg/mmol)                                                       | 92 (50 to 188)      | 87 (47 to 187)      |
| 24 hr urinary protein excretion $\geq 300$ (mg/24hrs): n (%)                              | 18 (4%)             | 21 (5%)             |
| Median (IQR) (if $\geq 300$ mg/24hrs)                                                     | 550 (400 to 1000)   | 900 (600 to 50000)  |
| Creatinine $>90$ $\mu$ mol/L: n (%)                                                       | 14 (3%)             | 11 (2%)             |
| Median (IQR) (if $>90$ $\mu$ mol/L)                                                       | 100 (94 to 110)     | 99 (91 to 111)      |
| Alanine or aspartate transaminase $>70$ IU/L: n (%)                                       | 19 (4%)             | 15 (3%)             |
| Median (IQR) (if $>70$ IU/L)                                                              | 107 (84 to 211)     | 105 (83 to 317)     |
| Platelet count $<150 \times 10^9$ /L: n (%)                                               | 44 (10%)            | 43 (10%)            |
| Median (IQR) (if $<150 \times 10^9$ /L)                                                   | 130 (108 to 140)    | 131 (118 to 144)    |
| Estimated fetal weight $<10^{\text{th}}$ centile on ultrasound                            | 61 (14%)            | 66 (15%)            |
| <b>Antihypertensive medication at study entry</b>                                         | 359 (80%)           | 374 (83%)           |

|                                                                 |                  |                  |
|-----------------------------------------------------------------|------------------|------------------|
| One oral agent                                                  | 240/359 (67%)    | 241/374 (64%)    |
| Two or more oral agents                                         | 117/359 (33%)    | 132/374 (35%)    |
| One intravenous agent                                           | 2/359 (1%)       | 5/374 (1%)       |
| <b>Aspirin prescribed during pregnancy</b>                      | 170 (38%)        | 189 (42%)        |
| Median (IQR) gestational age aspirin first prescribed (weeks)   | 13 (11 to 16)    | 12 (11 to 16)    |
| <b>Low molecular weight heparin prescribed during pregnancy</b> | 125 (28%)        | 117 (26%)        |
| Median (IQR) Gestational age heparin first prescribed (weeks)   | 33 (31 to 34)    | 34 (31 to 35)    |
| <b>Most recent proteinuria reading</b>                          |                  |                  |
| Urinary protein-creatinine ratio recorded: n (%)                | 434 (97%)        | 441 (98%)        |
| Median (IQR) (mg/mmol)                                          | 83 (42 to 186)   | 80 (42 to 172)   |
| 24 hr urinary protein excretion recorded: n (%)                 | 15 (3%)          | 14 (3%)          |
| Median (IQR) (mg/24hrs)                                         | 78 (31 to 550)   | 107 (31 to 460)  |
| <b>Most recent lab parameters prior to study entry</b>          |                  |                  |
| Median (IQR) haemoglobin (g/L)                                  | 116 (108 to 124) | 117 (108 to 124) |
| Median (IQR) platelet count ( $\times 10^9/L$ )                 | 213 (174 to 255) | 210 (174 to 251) |
| Median (IQR) creatinine ( $\mu\text{mol/L}$ )                   | 59 (50 to 68)    | 59 (51 to 67)    |
| Median (IQR) alanine aminotransferase (U/L)                     | 15 (10 to 22)    | 15 (10 to 22)    |
| n (%)                                                           | 424 (95%)        | 422 (94%)        |
| Median (IQR) aspartate aminotransferase (U/L)                   | 20 (15 to 32)    | 20 (15 to 24)    |
| n (%)                                                           | 51 (11%)         | 59 (13%)         |
| Median (IQR) Placental growth factor (pg/ml)                    | 16 (12 to 43)    | 12 (12 to 22)    |
| n (%)                                                           | 33 (7%)          | 28 (6%)          |
| Median (IQR) uric acid ( $\mu\text{mol/L}$ )                    | 366 (303 to 416) | 357 (300 to 424) |
| n (%)                                                           | 166 (37%)        | 165 (37%)        |
| <b>Bishop score assessed at study entry</b>                     | 9 (2%)           | 6 (1%)           |
| <2                                                              | 2/9 (22%)        | 2/6 (33%)        |
| 2-6                                                             | 7/9 (78%)        | 4/6 (67%)        |
| <b>Fetal growth scan in last two weeks</b>                      | 366 (82%)        | 375 (83%)        |
| Suspected fetal growth restriction                              | 79/366 (22%)     | 85/375 (23%)     |
| Indicator of fetal growth restriction (non-exclusive)           |                  |                  |
| Abdominal circumference <10 <sup>th</sup> centile               | 23 (5%)          | 32 (7%)          |
| Estimated fetal weight <10 <sup>th</sup> centile                | 67 (15%)         | 73 (16%)         |

|                                                              |           |           |
|--------------------------------------------------------------|-----------|-----------|
| Umbilical artery pulsatility index >95 <sup>th</sup> centile | 8 (2%)    | 13 (3%)   |
| Absent or reversed umbilical artery end diastolic flow       | 2 (0%)    | 5 (1%)    |
| Amniotic fluid index <5 <sup>th</sup> centile                | 4 (1%)    | 7 (2%)    |
| <b>In-patient at time of trial entry</b>                     | 362 (81%) | 371 (82%) |

Data are n (%) unless shown otherwise. n/N (%) indicates that the denominator only includes participants with a relevant measurement for that variable.



**Supplementary Table 3: Additional secondary maternal outcomes**

|                                                                                   | <b>Planned delivery<br/>(n=448)</b> | <b>Expectant<br/>management<br/>(n=451)</b> |
|-----------------------------------------------------------------------------------|-------------------------------------|---------------------------------------------|
| <b>Components by category (non-exclusive)</b>                                     |                                     |                                             |
| Maternal death                                                                    | 0 (0%)                              | 1 (0%)                                      |
| <b>Central nervous system</b>                                                     |                                     |                                             |
| Eclampsia                                                                         | 3 (1%)                              | 4 (1%)                                      |
| Glasgow coma score <13                                                            | 0 (0%)                              | 0 (0%)                                      |
| Stroke or reversible ischaemic neurological deficit                               | 0 (0%)                              | 0 (0%)                                      |
| Transient ischaemic attack                                                        | 0 (0%)                              | 0 (0%)                                      |
| Cortical blindness or retinal detachment                                          | 0 (0%)                              | 0 (0%)                                      |
| Posterior reversible encephalopathy                                               | 0 (0%)                              | 0 (0%)                                      |
| <b>Cardiorespiratory</b>                                                          |                                     |                                             |
| Positive inotropic support                                                        | 0 (0%)                              | 1 (0%)                                      |
| Infusion of a third parenteral antihypertensive drug                              | 2 (0%)                              | 0 (0%)                                      |
| Myocardial ischaemia or infarction                                                | 1 (0%)                              | 0 (0%)                                      |
| SpO <sub>2</sub> <90%                                                             | 2 (0%)                              | 3 (1%)                                      |
| ≥50% FiO <sub>2</sub> for >1 hr                                                   | 1 (0%)                              | 0 (0.0)                                     |
| Intubation (other than for caesarean section)                                     | 2 (0%)                              | 0 (0%)                                      |
| Pulmonary oedema                                                                  | 1 (0%)                              | 2 (0%)                                      |
| <b>Haematological</b>                                                             |                                     |                                             |
| Transfusion of any blood product                                                  | 20 (5%)                             | 23 (5%)                                     |
| Platelet count <50×10 <sup>9</sup> per L, with no transfusion                     | 2 (0%)                              | 4 (1%)                                      |
| <b>Hepatic</b>                                                                    |                                     |                                             |
| Hepatic dysfunction                                                               | 44 (10%)                            | 63 (14%)                                    |
| Hepatic haematoma or rupture                                                      | 0 (0%)                              | 0 (0%)                                      |
| <b>Renal</b>                                                                      |                                     |                                             |
| Acute renal insufficiency (creatinine >150 µmol/L; no pre-existing renal disease) | 3 (1%)                              | 4 (1%)                                      |
| Acute renal failure (creatinine >200 µmol/L; pre-existing renal disease)          | 0 (0%)                              | 0 (0%)                                      |
| Dialysis                                                                          | 0 (0%)                              | 0 (0%)                                      |
| <b>Other</b>                                                                      |                                     |                                             |

|                                                                               |               |               |
|-------------------------------------------------------------------------------|---------------|---------------|
| Placental abruption                                                           | 4 (1%)        | 4 (1%)        |
| <b>Systolic blood pressure <math>\geq 160</math> mmHg post randomisation</b>  | 267 (60%)     | 313 (70%)     |
| Systolic blood pressure $\geq 160$ mmHg (randomisation to delivery)           | 203 (45%)     | 261 (58%)     |
| Systolic blood pressure $\geq 160$ mmHg (delivery to post-delivery discharge) | 172 (39%)     | 173 (39%)     |
| <b>Highest BP recorded: randomisation to delivery</b>                         |               |               |
| Mean (SD) systolic blood pressure (mmHg)                                      | 159.4 (17%)   | 164.4 (17%)   |
| Mean (SD) diastolic blood pressure (mmHg)                                     | 95.0 (11%)    | 97.7 (12%)    |
| <b>Highest BP recorded: delivery to post-delivery discharge</b>               |               |               |
| Mean (SD) systolic blood pressure (mmHg)                                      | 155.8 (16%)   | 156.6 (16%)   |
| Mean (SD) diastolic blood pressure (mmHg)                                     | 91.5 (12%)    | 92.5 (12%)    |
| <b>Antihypertensive medication: randomisation to delivery</b>                 | 381 (85%)     | 405 (90%)     |
| One oral agent                                                                | 233/381 (61%) | 185/405 (46%) |
| Two or more oral agents                                                       | 147/381 (39%) | 218/405 (54%) |
| One intravenous agent                                                         | 17/381 (5%)   | 37/405 (9%)   |
| Two or more intravenous agents                                                | 3/381 (1%)    | 4/405 (1%)    |
| <b>Anti-hypertensive drugs administered (non-exclusive)</b>                   |               |               |
| Hydralazine                                                                   | 10/381 (3%)   | 25/405 (6%)   |
| Labetalol                                                                     | 328/381 (86%) | 353/405 (87%) |
| Methyldopa                                                                    | 39/381 (10%)  | 61/405 (15%)  |
| Nifedipine                                                                    | 162/381 (43%) | 222/405 (55%) |
| Amlodipine                                                                    | 5/381 (1%)    | 5/405 (1%)    |
| Atenolol                                                                      | 2/381 (1%)    | 3/405 (1%)    |
| Diltiazem                                                                     | 0/381 (0%)    | 0/405 (0%)    |
| Doxazosin                                                                     | 2/381 (1%)    | 6/405 (2%)    |
| Ketaserin                                                                     | 0/381 (0%)    | 0/405 (0%)    |
| Propranolol                                                                   | 0/381 (0%)    | 1/405 (0%)    |
| Verapamil                                                                     | 0/381 (0%)    | 0/405 (0%)    |
| Other                                                                         | 2/381 (1%)    | 3/405 (1%)    |
| Progression to HELLP syndrome                                                 | 7 (2%)        | 10 (2%)       |
| Magnesium sulfate: randomisation to delivery                                  | 31 (7%)       | 69 (15%)      |
| Low molecular weight heparin: randomisation to delivery                       | 157 (35%)     | 208 (46%)     |
| Steroids for fetal lung maturation                                            | 291 (65%)     | 248 (55%)     |

|                                                                                                                  |                  |                  |
|------------------------------------------------------------------------------------------------------------------|------------------|------------------|
| Number of doses of steroids                                                                                      |                  |                  |
| 1                                                                                                                | 12/291 (4%)      | 14/248 (6%)      |
| 2                                                                                                                | 277/291 (95%)    | 229/248 (92%)    |
| 3                                                                                                                | 0/291 (0%)       | 0/248 (0%)       |
| ≥4                                                                                                               | 2/291 (1%)       | 5/248 (2%)       |
| <b>Suspected fetal growth restriction post randomisation</b>                                                     | 13 (3%)          | 41 (9%)          |
| <b>Indicator of fetal growth restriction (non-exclusive)</b>                                                     |                  |                  |
| Abdominal circumference <10 <sup>th</sup> centile                                                                | 6                | 15               |
| Estimated fetal weight <10 <sup>th</sup> centile                                                                 | 8                | 28               |
| Umbilical artery pulsatility index >95 <sup>th</sup> centile                                                     | 3                | 13               |
| Absent or reversed umbilical artery end diastolic flow                                                           | 2                | 3                |
| Amniotic fluid index <5 <sup>th</sup> centile                                                                    | 2                | 7                |
| <b>Onset of labour</b>                                                                                           |                  |                  |
| Induced                                                                                                          | 304 (68%)        | 275 (61%)        |
| <b>Method of induction if induced (non-exclusive)</b>                                                            |                  |                  |
| Prostaglandin gel/pessary                                                                                        | 275/304 (91%)    | 238/275 (87%)    |
| Foley catheter                                                                                                   | 13/304 (4%)      | 7/275 (3%)       |
| Artificial rupture of membranes                                                                                  | 133/304 (44%)    | 120/275 (44%)    |
| Syntocinon                                                                                                       | 99/304 (33%)     | 90/275 (33%)     |
| Other                                                                                                            | 1/304 (0%)       | 3/275 (1%)       |
| <b>Estimated amount of blood loss at delivery (mls)</b>                                                          |                  |                  |
| Mean (SD)                                                                                                        | 559·0 (583·1)    | 557·9 (454·8)    |
| Median (IQR)                                                                                                     | 406 (300 to 600) | 400 (300 to 650) |
| <b>Confirmed maternal sepsis (positive blood or urine cultures) between randomisation and hospital discharge</b> | 2 (0%)           | 6 (1%)           |
| Blood culture                                                                                                    | 1/2 (50%)        | 5/6 (83%)        |
| Urine culture                                                                                                    | 1/2 (50%)        | 1/6 (17%)        |

Data are n (%) unless shown otherwise. n/N (%) indicates that the denominator only includes participants with a relevant measurement for that variable. HELLP: haemolysis, elevated liver enzymes, low platelets syndrome.

**Supplementary Table 4: Process outcomes: time between randomisation to initiation of delivery and delivery**

|                                                                     | <b>Planned delivery<br/>(n = 448)</b> | <b>Expectant<br/>management<br/>(n = 451)</b> |
|---------------------------------------------------------------------|---------------------------------------|-----------------------------------------------|
| <b>Time between randomisation and initiation of delivery (days)</b> |                                       |                                               |
| <b>Overall</b>                                                      |                                       |                                               |
| n                                                                   | 447                                   | 450                                           |
| Median (IQR)                                                        | 1 (1 to 2)                            | 5 (3 to 8)                                    |
| <b>By gestational age at randomisation</b>                          |                                       |                                               |
| <b>34<sup>+0</sup> to 34<sup>+6</sup></b>                           |                                       |                                               |
| n (%)                                                               | 131 (29%)                             | 135 (30%)                                     |
| Median (IQR)                                                        | 1 (1 to 2)                            | 6 (2 to 11)                                   |
| <b>35<sup>+0</sup> to 35<sup>+6</sup></b>                           |                                       |                                               |
| n (%)                                                               | 136 (30%)                             | 131 (29%)                                     |
| Median (IQR)                                                        | 1 (1 to 2)                            | 6 (3 to 10)                                   |
| <b>36<sup>+0</sup> to 36<sup>+6</sup></b>                           |                                       |                                               |
| n (%)                                                               | 180 (40%)                             | 184 (41%)                                     |
| Median (IQR)                                                        | 1 (1 to 2)                            | 4 (2 to 6)                                    |
| <b>Time between randomisation and delivery (days)</b>               |                                       |                                               |
| <b>Overall</b>                                                      |                                       |                                               |
| n                                                                   | 447                                   | 451                                           |
| Median (IQR)                                                        | 2 (1 to 4)                            | 6 (3 to 9)                                    |
| <b>By gestational age at randomisation</b>                          |                                       |                                               |
| <b>34<sup>+0</sup> to 34<sup>+6</sup></b>                           |                                       |                                               |
| n (%)                                                               | 131 (29%)                             | 135 (30%)                                     |
| Median (IQR)                                                        | 3 (1 to 4)                            | 7 (3 to 12)                                   |
| <b>35<sup>+0</sup> to 35<sup>+6</sup></b>                           |                                       |                                               |
| n (%)                                                               | 136 (30%)                             | 132 (29%)                                     |
| Median (IQR)                                                        | 2 (1 to 3)                            | 7 (4 to 11)                                   |
| <b>36<sup>+0</sup> to 36<sup>+6</sup></b>                           |                                       |                                               |
| n (%)                                                               | 180 (40%)                             | 184 (41%)                                     |
| Median (IQR)                                                        | 2 (2 to 4)                            | 5 (4 to 7)                                    |

**Supplementary Table 5: Additional secondary perinatal outcomes (Intention To Treat analysis)**

|                                                                 | <b>Planned<br/>delivery<br/>(n = 471)</b> | <b>Expectant<br/>management<br/>(n = 475)</b> |
|-----------------------------------------------------------------|-------------------------------------------|-----------------------------------------------|
| <b>Mode of delivery</b>                                         |                                           |                                               |
| Spontaneous vaginal                                             | 169 (36%)                                 | 139 (29%)                                     |
| Spontaneous vaginal (cephalic)                                  | 165 (35%)                                 | 138 (29%)                                     |
| Spontaneous vaginal (breech)                                    | 4 (1%)                                    | 1 (0%)                                        |
| Assisted vaginal (cephalic)                                     | 40 (9%)                                   | 47 (10%)                                      |
| Assisted vaginal – vacuum                                       | 13 (3%)                                   | 19 (4%)                                       |
| Assisted vaginal – forceps                                      | 27 (6%)                                   | 28 (6%)                                       |
| Caesarean section                                               | 260 (55%)                                 | 289 (61%)                                     |
| Pre-labour caesarean section                                    | 153 (33%)                                 | 168 (35%)                                     |
| Emergency caesarean section                                     | 107 (23%)                                 | 121 (26%)                                     |
| <b>Indication for assisted vaginal delivery (non-exclusive)</b> |                                           |                                               |
| Maternal comorbidity or disease                                 | 1/40 (3%)                                 | 3/47 (6%)                                     |
| Failure to progress in second stage                             | 16/40 (40%)                               | 17/47 (36%)                                   |
| Suspected fetal distress                                        | 28/40 (70%)                               | 30/47 (64%)                                   |
| <b>Indication for caesarean delivery (non-exclusive)</b>        |                                           |                                               |
| Maternal comorbidity or disease                                 | 40/260 (15%)                              | 78/289 (27%)                                  |
| Previous caesarean delivery/uterine surgery                     | 57/260 (22%)                              | 57/289 (20%)                                  |
| Failure to progress in first stage                              | 39/260 (15%)                              | 46/289 (16%)                                  |
| Failure to progress in second stage                             | 2/260 (1%)                                | 1/289 (0%)                                    |
| Suspected fetal distress                                        | 83/260 (32%)                              | 101/289 (35%)                                 |
| Failed instrumental delivery                                    | 3/260 (1%)                                | 1/289 (0%)                                    |
| Fetal presentation not cephalic                                 | 42/260 (16%)                              | 31/289 (11%)                                  |
| Twins                                                           | 6/260 (2%)                                | 9/289 (3%)                                    |
| Maternal request                                                | 7/260 (3%)                                | 1/289 (0%)                                    |
| <b>Gestational age at delivery (days)</b>                       |                                           |                                               |
| <37 weeks                                                       | 387 (83%)                                 | 261 (55%)                                     |
| <b>Baby sex</b>                                                 |                                           |                                               |
| Boy                                                             | 240 (51%)                                 | 233 (49%)                                     |
| Girl                                                            | 229 (49%)                                 | 242 (51%)                                     |
| <b>Umbilical artery pH &lt;7.05</b>                             | 6/281 (2%)                                | 7/266 (3%)                                    |
| <b>Umbilical arterial pH collected</b>                          | 281 (60%)                                 | 266 (56%)                                     |

|                                                                   |          |          |
|-------------------------------------------------------------------|----------|----------|
| <b>Principal recorded indication for neonatal unit admission</b>  |          |          |
| <b>Number of babies admitted to the neonatal unit*</b>            | 196      | 159      |
| <b>Preterm</b>                                                    |          |          |
| Prematurity                                                       | 83 (42%) | 40 (25%) |
| <b>Cardiorespiratory</b>                                          |          |          |
| Respiratory disease                                               | 47 (24%) | 41 (26%) |
| Cardiovascular disease                                            | 0 (0%)   | 1 (1%)   |
| Failed oximetry testing                                           | 0 (0%)   | 1 (1%)   |
| <b>Gastric, Hepatic, Metabolic</b>                                |          |          |
| Gastrointestinal tract disease                                    | 0 (0%)   | 0 (0%)   |
| Jaundice                                                          | 12 (6%)  | 11 (7%)  |
| Hypoglycaemia                                                     | 21 (11%) | 31 (20%) |
| Other metabolic disease                                           | 0 (0%)   | 0 (0%)   |
| <b>Neurological</b>                                               |          |          |
| Convulsions                                                       | 1 (1%)   | 0 (0%)   |
| Hypoxic ischaemic encephalopathy                                  | 0 (0%)   | 0 (0%)   |
| Poor condition at birth                                           | 2 (1%)   | 3 (2%)   |
| Neonatal abstinence syndrome                                      | 0 (0%)   | 0 (0%)   |
| Other neurological disease                                        | 0 (0%)   | 0 (0%)   |
| <b>Infection</b>                                                  |          |          |
| Infection suspected/confirmed                                     | 9 (5%)   | 12 (8%)  |
| <b>Size, weight, feeding</b>                                      |          |          |
| Intrauterine growth restriction/ Small for gestational age infant | 8 (4%)   | 10 (6%)  |
| Poor feeding or weight loss                                       | 4 (2%)   | 2 (1%)   |
| <b>Anomaly or trauma</b>                                          |          |          |
| Congenital anomaly suspected/ confirmed                           | 2 (1%)   | 0 (0%)   |
| Birth trauma/ injury                                              | 0 (0%)   | 0 (0%)   |
| <b>Relating to carer</b>                                          |          |          |
| Social issues/Foster care                                         | 0 (0%)   | 0 (0%)   |
| Maternal admission/emergency                                      | 1 (1%)   | 2 (1%)   |
| <b>Specialist care</b>                                            |          |          |
| Surgery                                                           | 0 (0%)   | 0 (0%)   |
| Palliative care                                                   | 0 (0%)   | 0 (0%)   |

|                                                                                           |             |             |
|-------------------------------------------------------------------------------------------|-------------|-------------|
| <b>Monitoring or investigation</b>                                                        |             |             |
| Monitoring                                                                                | 4 (2%)      | 5 (3%)      |
| Exclusively for specific investigation                                                    | 0 (0%)      | 0 (0%)      |
| Continuing care                                                                           | 2 (1%)      | 0 (0%)      |
| <b>Need for respiratory support</b>                                                       | 45 (10%)    | 48 (10%)    |
| <b>Type of respiratory support needed (non-exclusive)</b>                                 |             |             |
| Endotracheal ventilation                                                                  | 10/45 (22%) | 14/48 (29%) |
| Continuous positive airway pressure                                                       | 36/45 (80%) | 37/48 (77%) |
| High flow oxygen                                                                          | 12/45 (27%) | 17/48 (35%) |
| <b>Cerebral ultrasound scan performed</b>                                                 | 18 (4%)     | 24 (5%)     |
| <b>Abnormalities found</b>                                                                | 2/18 (11%)  | 1/24 (4%)   |
| Intraventricular haemorrhage (IVH) Grade I-II                                             | 1/2 (50%)   | 0/1 (0%)    |
| Intraventricular haemorrhage (IVH) causing ventricular distension                         | 1/2 (50%)   | 0/1 (0%)    |
| Other                                                                                     | 0/2 (0%)    | 1/1 (100%)  |
| <b>Sepsis confirmed</b>                                                                   | 3 (1%)      | 2 (0%)      |
| Positive blood cultures                                                                   | 3/3 (100%)  | 1/2 (50%)   |
| Cerebrospinal fluid cultures                                                              | 0/3 (0%)    | 1/2 (50%)   |
| <b>Necrotising enterocolitis confirmed (Bell's stage 2 or 3)</b>                          | 0 (0%)      | 0 (0%)      |
| <b>Seizures</b>                                                                           | 0 (0%)      | 0 (0%)      |
| <b>Diagnosed Encephalopathy</b>                                                           | 0 (0%)      | 0 (0%)      |
| <b>Diagnosed hypoglycaemia (blood glucose &lt;2.6 mmol/L on ≥2 consecutive occasions)</b> | 80 (17%)    | 72 (15%)    |
| Intravenous dextrose required                                                             | 32/80 (40%) | 32/72 (44%) |
| Tube feeding required                                                                     | 41/80 (51%) | 45/72 (63%) |
| <b>Method of infant feeding 24 hrs prior to discharge</b>                                 |             |             |
| Exclusive breast-feeding                                                                  | 112 (24%)   | 139 (30%)   |
| Mixed feeding                                                                             | 174 (38%)   | 161 (34%)   |
| Exclusive formula feeding                                                                 | 176 (38%)   | 168 (36%)   |

Data are n (%) unless shown otherwise. n/N (%) indicates that the denominator only includes participants with a relevant measurement for that variable.

\*Number of babies admitted to the neonatal unit (denominator for the principal recorded indications).

**Supplementary Table 6: Secondary perinatal outcomes post randomisation (by Per Protocol analysis)**

|                                                                   | <b>Planned<br/>delivery<br/>(n = 342)</b> | <b>Expectant<br/>management<br/>(n = 470)</b> | <b>Adjusted<br/>effect measure*<br/>(95% CI)</b> |
|-------------------------------------------------------------------|-------------------------------------------|-----------------------------------------------|--------------------------------------------------|
| Stillbirth                                                        | 0 (0%)                                    | 0 (0%)                                        | -                                                |
| Neonatal deaths within 7 days of delivery                         | 0 (0%)                                    | 0 (0%)                                        | -                                                |
| Neonatal death before discharge                                   | 0 (0%)                                    | 0 (0%)                                        | -                                                |
| Median (IQR) gestational age at delivery (days)                   | 252 (246 to 257)                          | 258 (251 to 260)                              | -4.0 (-4.6, -3.4)                                |
| <b>Mode of delivery</b>                                           |                                           |                                               |                                                  |
| Spontaneous vaginal                                               | 127 (37%)                                 | 138 (29%)                                     | 1.21 (1.01, 1.44)                                |
| Assisted vaginal                                                  | 34 (10%)                                  | 46 (10%)                                      | 0.97 (0.64, 1.46)                                |
| Caesarean section                                                 | 181 (53%)                                 | 286 (61%)                                     | 0.90 (0.81, 1.00)                                |
| Median (IQR) birth weight (g)                                     | 2400 (2060 to 2780)                       | 2483 (2150 to 2912)                           | -109 (-167, -51)                                 |
| Median (IQR) birth weight centile†                                | 34 (17 to 61)                             | 30 (13 to 61)                                 | 2.5 (-2.3, 7.4)                                  |
| Birth weight <10 <sup>th</sup> centile                            | 53 (16%)                                  | 95 (20%)                                      | 0.77 (0.56, 1.05)                                |
| Birth weight <3 <sup>rd</sup> centile                             | 13 (4%)                                   | 27 (6%)                                       | 0.69 (0.36, 1.33)                                |
| Median (IQR) Apgar score at 5 minutes post birth                  | 10 (9 to 10)                              | 10 (9 to 10)                                  | -                                                |
| Median (IQR) umbilical arterial pH                                | 7.26 (7.19 to 7.30)                       | 7.25 (7.20 to 7.30)                           | 0.00 (-0.01, 0.02)                               |
| Umbilical arterial pH collected                                   | 201 (59%)                                 | 265 (56%)                                     |                                                  |
| Number of infants admitted to neonatal unit                       | 155 (45%)                                 | 155 (33%)                                     | 1.40 (1.18, 1.66)                                |
| <b>Principal recorded indication for neonatal unit admission</b>  |                                           |                                               |                                                  |
| Prematurity                                                       | 66/155 (43%)                              | 38/155 (25%)                                  |                                                  |
| Respiratory disease                                               | 34/155 (22%)                              | 39/155 (25%)                                  |                                                  |
| Hypoglycaemia                                                     | 19/155 (12%)                              | 31/155 (20%)                                  |                                                  |
| Jaundice                                                          | 10/155 (7%)                               | 11/155 (7%)                                   |                                                  |
| Infection suspected/confirmed                                     | 7/155 (5%)                                | 12/155 (8%)                                   |                                                  |
| Intrauterine growth restriction/ Small for gestational age infant | 7/155 (5%)                                | 10/155 (7%)                                   |                                                  |
| Other                                                             | 12/155 (8%)                               | 14/155 (9%)                                   |                                                  |
| Need for respiratory support                                      | 32 (9%)                                   | 46 (10%)                                      | 0.98 (0.55, 1.77)                                |
| Need for supplementary oxygen prior to discharge                  | 47 (14%)                                  | 47 (10%)                                      | 1.41 (0.97, 2.07)                                |
| Median (IQR) supplemental oxygen required                         | 1 (1 to 2)                                | 2 (1 to 3)                                    |                                                  |



|                                                                                        |             |             |                    |
|----------------------------------------------------------------------------------------|-------------|-------------|--------------------|
| Cerebral ultrasound abnormalities found/<br>number tested                              | 0/12 (0%)   | 1/20 (5%)   |                    |
| Sepsis confirmed                                                                       | 1 (0%)      | 2 (0%)      |                    |
| Necrotising enterocolitis                                                              | 0 (0%)      | 0 (0%)      |                    |
| Seizures                                                                               | 0 (0%)      | 0 (0%)      |                    |
| Encephalopathy                                                                         | 0 (0%)      | 0 (0%)      |                    |
| Hypoglycaemia during neonatal unit admission                                           | 61 (18%)    | 71 (15%)    |                    |
| Exclusive breast-feeding 24 hrs prior to discharge                                     | 84 (25%)    | 139 (30%)   |                    |
| <b>Total neonatal unit stay</b>                                                        |             |             |                    |
| Median (IQR) days in neonatal unit                                                     | 6 (2 to 10) | 6 (3 to 12) | -0.4 (-2.07, 1.21) |
| Number (%) admitted for at least one day                                               | 147 (43%)   | 149 (32%)   |                    |
| <b>Category of care during neonatal unit stay<br/>(separation of baby from mother)</b> |             |             |                    |
| Median (IQR) days in intensive care                                                    | 2 (1 to 3)  | 3 (1 to 4)  | -1.4 (-2.7, 2.5)   |
| Number (%) admitted                                                                    | 22 (6%)     | 19 (4%)     |                    |
| Median (IQR) days in high dependency care                                              | 1 (1 to 3)  | 2 (1 to 5)  | -0.6 (-3.3, 2.2)   |
| Number (%) admitted                                                                    | 39 (11%)    | 32 (7%)     |                    |
| Median (IQR) days in special care                                                      | 5 (2 to 10) | 6 (2 to 11) | 0 (-1.7, 1.7)      |
| Number (%) admitted                                                                    | 135 (40%)   | 139 (30%)   |                    |
| <b>Category of care during other postnatal stay<br/>(baby alongside mother)</b>        |             |             |                    |
| Median (IQR) days in transitional care                                                 | 6 (2 to 8)  | 5 (4 to 6)  | -                  |
| Number (%) admitted                                                                    | 26 (8%)     | 16 (3%)     |                    |
| Median (IQR) days in postnatal care                                                    | 3 (2 to 5)  | 3 (2 to 4)  | 0.25 (-0.06, 0.56) |
| Number (%) admitted                                                                    | 249 (73%)   | 382 (82%)   |                    |

Data are n (%) unless otherwise stated. Effect measures are risk ratios for categorical variables (risk in planned delivery group/ risk in expectant management group) and median differences for continuous variables (median in planned delivery group - median in expectant management group). CI: confidence intervals; IQR: interquartile range. n/N (%) indicates that the denominator only includes participants with a relevant measurement for that variable.

\*Adjusted for centre, singleton/twin pregnancies, severity of hypertension in 48 hours prior to enrolment, parity, previous caesarean section and gestational age at randomisation.

† Birth weight centile calculated using the Stata add-in function zanthro using the British 1990 Growth Reference (reanalysed 2009).

**Supplementary Table 7: Additional secondary perinatal outcomes (by Per Protocol analysis)**

|                                                                 | <b>Planned<br/>delivery<br/>(n = 342)</b> | <b>Expectant<br/>management<br/>(n = 470)</b> |
|-----------------------------------------------------------------|-------------------------------------------|-----------------------------------------------|
| <b>Mode of delivery</b>                                         |                                           |                                               |
| Spontaneous vaginal                                             | 127 (37%)                                 | 138 (29%)                                     |
| Spontaneous vaginal (cephalic)                                  | 125 (37%)                                 | 137 (29%)                                     |
| Spontaneous vaginal (breech)                                    | 2 (1%)                                    | 1 (0%)                                        |
| Assisted vaginal (cephalic)                                     | 34 (10%)                                  | 46 (10%)                                      |
| Assisted vaginal – vacuum                                       | 12 (4%)                                   | 19 (4%)                                       |
| Assisted vaginal – forceps                                      | 22 (6%)                                   | 27 (6%)                                       |
| Caesarean section                                               | 181 (53%)                                 | 286 (61%)                                     |
| Pre-labour caesarean section                                    | 92 (27%)                                  | 167 (36%)                                     |
| Emergency caesarean section                                     | 89 (26%)                                  | 119 (25%)                                     |
| <b>Indication for assisted vaginal delivery (non-exclusive)</b> |                                           |                                               |
| Maternal comorbidity or disease                                 | 1/34 (3%)                                 | 3/46 (7%)                                     |
| Failure to progress in second stage                             | 13/34 (38%)                               | 17/46 (37%)                                   |
| Suspected fetal distress                                        | 25/34 (74%)                               | 29/46 (63%)                                   |
| <b>Indication for caesarean delivery (non-exclusive)</b>        |                                           |                                               |
| Maternal comorbidity or disease                                 | 25/181 (14%)                              | 75/286 (26%)                                  |
| Previous caesarean delivery/uterine surgery                     | 30/181 (17%)                              | 55/286 (19%)                                  |
| Failure to progress in first stage                              | 31/181 (17%)                              | 46/286 (16%)                                  |
| Failure to progress in second stage                             | 2/181 (1%)                                | 1/286 (0%)                                    |
| Suspected fetal distress                                        | 66/181 (37%)                              | 101/286 (35%)                                 |
| Failed instrumental delivery                                    | 3/181 (2%)                                | 1/286 (0%)                                    |
| Fetal presentation not cephalic                                 | 33/181 (18%)                              | 31/286 (11%)                                  |
| Twins                                                           | 2/181 (1%)                                | 9/286 (3%)                                    |
| Maternal request                                                | 5/181 (3%)                                | 1/286 (0%)                                    |
| <b>Gestational age at delivery (days)</b>                       |                                           |                                               |
| <37 weeks                                                       | 286 (84%)                                 | 256 (55%)                                     |
| <b>Baby sex</b>                                                 |                                           |                                               |
| Boy                                                             | 176 (52%)                                 | 229 (49%)                                     |
| Girl                                                            | 166 (49%)                                 | 241 (51%)                                     |
| <b>Umbilical artery pH &lt;7.05</b>                             | 5/201 (3%)                                | 7/265 (3%)                                    |

|                                                                   |           |           |
|-------------------------------------------------------------------|-----------|-----------|
| <b>Umbilical arterial pH collected</b>                            | 201 (59%) | 265 (57%) |
| <b>Principal recorded indication for neonatal unit admission</b>  |           |           |
| <b>Number of babies admitted to the neonatal unit*</b>            | 155       | 155       |
| <b>Preterm</b>                                                    |           |           |
| Prematurity                                                       | 66 (43%)  | 38 (25%)  |
| <b>Cardiorespiratory</b>                                          |           |           |
| Respiratory disease                                               | 34 (22%)  | 39 (25%)  |
| Cardiovascular disease                                            | 0 (0%)    | 1 (1%)    |
| Failed oximetry testing                                           | 0 (0%)    | 1 (1%)    |
| <b>Gastric, Hepatic, Metabolic</b>                                |           |           |
| Gastrointestinal tract disease                                    | 0 (0%)    | 0 (0%)    |
| Jaundice                                                          | 10 (7%)   | 11 (7%)   |
| Hypoglycaemia                                                     | 19 (12%)  | 31 (20%)  |
| Other metabolic disease                                           | 0 (0%)    | 0 (0%)    |
| <b>Neurological</b>                                               |           |           |
| Convulsions                                                       | 1 (1%)    | 0 (0%)    |
| Hypoxic ischaemic encephalopathy                                  | 0 (0%)    | 0 (0%)    |
| Poor condition at birth                                           | 2 (1%)    | 3 (2%)    |
| Neonatal abstinence syndrome                                      | 0 (0%)    | 0 (0%)    |
| Other neurological disease                                        | 0 (0%)    | 0 (0%)    |
| <b>Infection</b>                                                  |           |           |
| Infection suspected/confirmed                                     | 7 (5%)    | 12 (8%)   |
| <b>Size, weight, feeding</b>                                      |           |           |
| Intrauterine growth restriction/ Small for gestational age infant | 7 (5%)    | 10 (7%)   |
| Poor feeding or weight loss                                       | 3 (2%)    | 2 (1%)    |
| <b>Anomaly or trauma</b>                                          |           |           |
| Congenital anomaly suspected/ confirmed                           | 0 (0%)    | 0 (0%)    |
| Birth trauma/ injury                                              | 0 (0%)    | 0 (0%)    |
| <b>Relating to carer</b>                                          |           |           |
| Social issues/Foster care                                         | 0 (0%)    | 0 (0%)    |
| Maternal admission/emergency                                      | 0 (0%)    | 2 (1%)    |
| <b>Specialist care</b>                                            |           |           |
| Surgery                                                           | 0 (0%)    | 0 (0·0)   |

|                                                                                           |             |             |
|-------------------------------------------------------------------------------------------|-------------|-------------|
| Palliative care                                                                           | 0 (0%)      | 0 (0.0)     |
| <b>Monitoring or investigation</b>                                                        |             |             |
| Monitoring                                                                                | 4 (3%)      | 5 (3%)      |
| Exclusively for a specific investigation                                                  | 0 (0%)      | 0 (0%)      |
| Continuing care                                                                           | 2 (1%)      | 0 (0%)      |
| <b>Need for respiratory support</b>                                                       | 32 (9%)     | 46 (10%)    |
| <b>Type of respiratory support needed (non-exclusive)</b>                                 |             |             |
| Endotracheal ventilation                                                                  | 6/32 (19%)  | 14/46 (30%) |
| Continuous positive airway pressure                                                       | 27/32 (84%) | 35/46 (76%) |
| High flow oxygen                                                                          | 8/32 (25%)  | 17/46 (37%) |
| <b>Cerebral ultrasound scan performed</b>                                                 | 12 (4%)     | 20 (4%)     |
| <b>Abnormalities found</b>                                                                | 0/12 (0%)   | 1/20 (5%)   |
| Intraventricular haemorrhage (IVH) Grade I-II                                             | 0/0 (0%)    | 0/1 (0%)    |
| Intraventricular haemorrhage (IVH) causing ventricular distension                         | 0/0 (0%)    | 0/1 (0%)    |
| Other                                                                                     | 0/0 (0%)    | 1/1 (100%)  |
| <b>Sepsis confirmed</b>                                                                   | 1 (0%)      | 2 (0%)      |
| Positive blood cultures                                                                   | 1/1 (100%)  | 1/2 (50%)   |
| Cerebrospinal fluid cultures                                                              | 0/1 (0%)    | 1/2 (50%)   |
| <b>Diagnosed Encephalopathy</b>                                                           | 0 (0%)      | 0 (0%)      |
| <b>Diagnosed hypoglycaemia (blood glucose &lt;2.6 mmol/L on ≥2 consecutive occasions)</b> | 61 (18%)    | 71 (15%)    |
| Intravenous dextrose required                                                             | 28/61 (46%) | 31/71 (44%) |
| Tube feeding required                                                                     | 33/61 (54%) | 44/71 (62%) |
| <b>Method of infant feeding 24 hrs prior to discharge</b>                                 |             |             |
| Exclusive breast-feeding                                                                  | 84 (25%)    | 139 (30%)   |
| Mixed feeding                                                                             | 124 (37%)   | 159 (34%)   |
| Exclusive formula feeding                                                                 | 128 (38%)   | 167 (36%)   |

Data are n (%) unless shown otherwise. n/N (%) indicates that the denominator only includes participants with a relevant measurement for that variable.

\*Number of babies admitted to the neonatal unit (denominator for the principal recorded indications).

**Supplementary Table 8: Unexpected maternal and infant serious adverse events by allocation**

|                                                 | <b>Planned delivery</b> | <b>Expectant management</b> |
|-------------------------------------------------|-------------------------|-----------------------------|
| <b>Serious adverse events (SAEs)</b>            | 9                       | 12                          |
| <b>Severity</b>                                 |                         |                             |
| Mild                                            | 4                       | 3                           |
| Moderate                                        | 2                       | 2                           |
| Severe                                          | 3                       | 7                           |
| <b>Causality</b>                                |                         |                             |
| Not related                                     | 7                       | 9                           |
| Possibly                                        | 2                       | 2                           |
| Probably                                        | 0                       | 1                           |
| <b>Action taken</b>                             |                         |                             |
| Intervention stopped prior to the event started | 2                       | 5                           |
| None                                            | 7                       | 7                           |
| <b>Outcome</b>                                  |                         |                             |
| Fatal                                           | 0                       | 1                           |
| Not resolved                                    | 0                       | 3                           |
| Resolved                                        | 6                       | 7                           |
| Resolved with sequelae                          | 1                       | 0                           |
| Resolving                                       | 2                       | 1                           |
| <b>System Organ Class</b>                       |                         |                             |
| Cardiac disorders                               | 3                       | 3                           |
| Gastrointestinal disorders                      | 0                       | 1                           |
| Infections and infestations                     | 1                       | 0                           |
| Neoplasms benign, malignant and unspecified     | 0                       | 1                           |
| Pregnancy, puerperium and perinatal conditions  | 4                       | 5                           |
| Renal and urinary disorders                     | 0                       | 1                           |
| Respiratory, thoracic and mediastinal disorders | 0                       | 1                           |
| Vascular disorders                              | 1                       | 0                           |

**Supplementary Figure 1: Forest plot for sub-group analysis (Per Protocol population) of primary perinatal outcome comparing Planned Delivery (PD) with Expectant Management (EM). p-values compare risk ratios across the different sub-groups of each factor.**

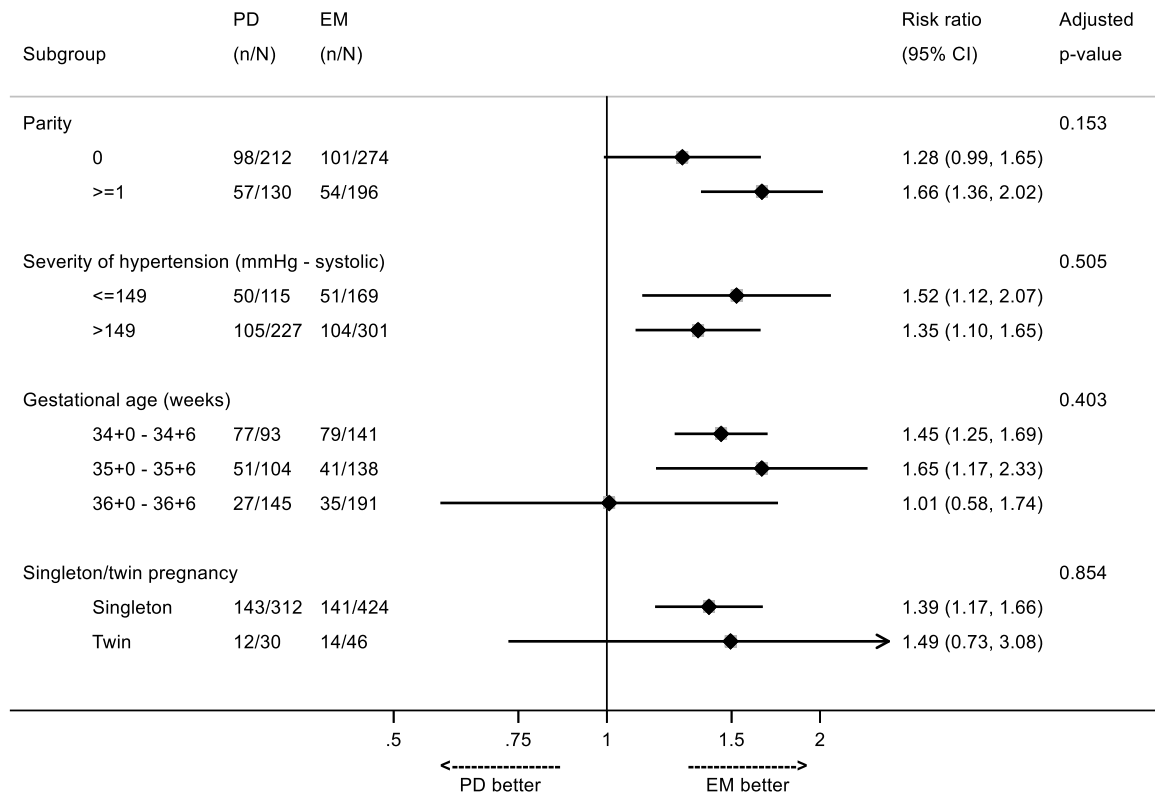

**Supplementary Table 9: Sensitivity analysis for the primary outcome, excluding women (maternal outcome) and babies (perinatal outcome) in the planned delivery arm for whom initiation of delivery was greater than 96 hours after randomisation**

|                                                                                                | <b>Planned<br/>delivery</b> | <b>Expectant<br/>management</b> | <b>Risk ratio<br/>(95% CI)<br/>p-value</b> | <b>Adjusted risk ratio<br/>(95% CI)<br/>p-value</b> |
|------------------------------------------------------------------------------------------------|-----------------------------|---------------------------------|--------------------------------------------|-----------------------------------------------------|
| Composite of maternal morbidity and/or recorded systolic BP $\geq$ 160 mmHg post randomisation | 274/429<br>(64%)            | 338/451<br>(75%)                | 0.85 (0.78, 0.93)<br>0.0003                | 0.85 (0.78, 0.93)<br>0.0003                         |
|                                                                                                |                             |                                 |                                            |                                                     |
| Composite of perinatal deaths and NNU admissions up to infant hospital discharge               | 184/450<br>(41%)            | 159/475<br>(34%)                | 1.23 (1.03, 1.46)<br>0.0205                | 1.24 (1.06, 1.44)<br>0.0075                         |

Data are n (%).

\*Adjusted for centre, singleton/twin pregnancies, severity of hypertension in 48 hours prior to enrolment, parity, previous caesarean section and gestational age at randomisation.

**Members of the PHOENIX Study Group**

Umber Agarwal, Irshad Ahmed, Bini Ajay, Zarko Alfirovic, Rita Arya, Gabrielle Bambridge, Jacqueline Bamfo, Sambita Basak, Ursula Bowler, Helen Cameron, David Churchill, Janet Cresswell, Fiona Crosfill, Mark Denbow, Madhuchanda Dey, Caroline Everden, Jo Ficquet, Katarzyna Gajewska-Knapik, Ramesh Ganapathy, Angela Garrett, Joanna Girling, Adam Gornall, Kate Harding, Eleanor Hendy, Richard Howard, Mark James, Antoinette Johnson, Michelle Kemp, Asma Khalil, Rehan Khan, Rahila Khan, Ellen Knox, Lavinia Margarit, Philippa Marsden, Karen McIntyre, Jenny Myers, Justine Nugent, Sanjay Rao, Zoey Robinson, Stephen Robson, Pauline Rushby, Laura Scholz, Mohamed Shahin, Bhavna Sharma, Nigel Simpson, Natasha Singh, Jenie Sparkes, Sophia Stone, Seni Subair, Bee Tan, Vidya Thakur, Sujatha Thamban, Jim Thornton, Sue Tohill, Elly Tsoi, Derek Tuffnell, Mark Waterstone, Jason Waugh, Cornelia Wiesender, Pensee Wu
